# Supplementary material for: Comprehensive Analysis of Phenolic Constituents, Biological Activities, and Derived Aroma Differences of Penthorum chinense Pursh Leaves after Processing into Green and Black Tea
Source: MDPI journal article supplement (doi:10.3390/foods13030399), 2024-01-26
Supplement: s1 [file s1]

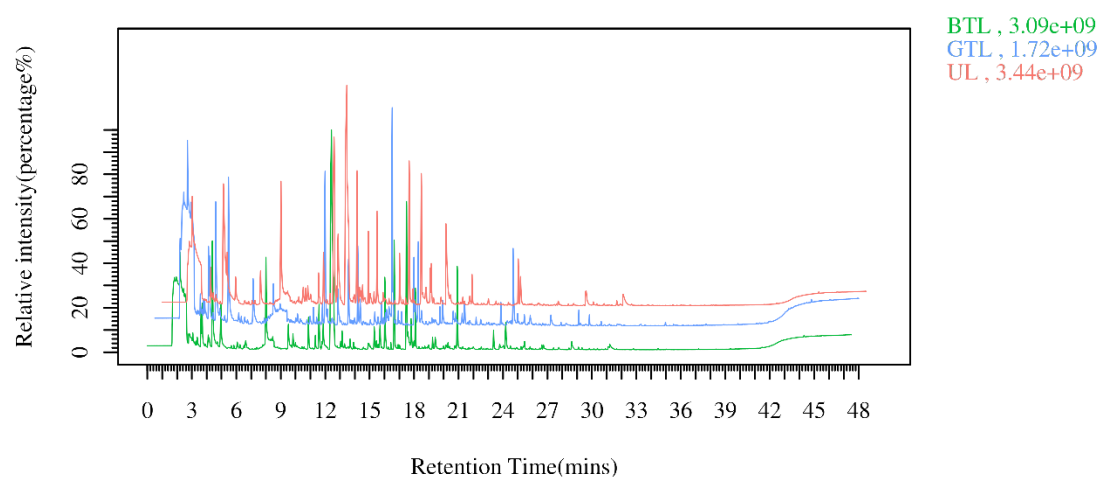

**Figure S1.** Typical total ion chromatograph (TICs) of *P. chinense* leaves (UL), *P. chinense* leaves green tea (GTL) and *P. chinense* leaves black tea (BTL).

**Table S1.** Volatile flavour compounds of *P. chinense* raw leaves (UL), green (GTL) and black tea (BTL)

| Volatile flavour compound | Retention time<br>(min) | CAS Number | Peak area (*10 <sup>7</sup> ) |               |                 |
|---------------------------|-------------------------|------------|-------------------------------|---------------|-----------------|
|                           |                         |            | BTL                           | GTL           | UL              |
| Alcohols                  |                         |            |                               |               |                 |
| Ethanol                   | 4.14                    | 64-17-5    | -                             | -             | 17315.93±707.11 |
| 1-Butanol                 | 10.42                   | 71-36-3    | 94.34±9.60                    | -             | -               |
| 4-Heptenal, (Z)-          | 13.05                   | 6728-31-0  | 270.98±8.07                   | -             | -               |
| 1-Pentanol                | 13.67                   | 71-41-0    | 408.90±46.75                  | 1751.95±45.97 | 382.99±1.89     |
| 1-Hexanol                 | 16.66                   | 111-27-3   | 5100.74±231.72                | 240.00±18.78  | 9047.90±245.80  |
| 3-Hexen-1-ol              | 16.92                   | 544-12-7   | 221.70±19.10                  | 32.22±5.36    | 635.93±38.49    |
| 2-Hexen-1-ol, (E)-        | 18.08                   | 928-95-0   | 2119.42±215.22                | 36.10±5.85    | 1645.51±284.13  |
| 1-Octen-3-ol              | 19.25                   | 3391-86-4  | 408.06±27.63                  | 411.96±22.60  | 1740.28±64.53   |
| 1-Hexanol, 2-ethyl-       | 20.28                   | 104-76-7   | 240.97±27.04                  | 224.93±12.65  | 262.53±35.22    |
| Linalool                  | 21.69                   | 78-70-6    | 54.32±4.55                    | 176.78±3.67   | 67.72±1.39      |

|                                            |         |            |               |                |                |
|--------------------------------------------|---------|------------|---------------|----------------|----------------|
| Terpinen-4-ol                              | 23.01   | 562-74-3   | -             | -              | 21.10±0.07     |
| 2-Furanmethanol                            | 24.36   | 98-00-0    | -             | 9.34±1.74      | -              |
| 2,6-Octadien-1-ol, 3,7-dimethyl-, (Z)-     | 28.53   | 106-25-2   | -             | 16.57±1.67     | -              |
| 1,6,10-Dodecatrien-3-ol, 3,7,11-trimethyl- | 32.38   | 7212-44-4  | -             | 5.62±0.46      | -              |
| 3-Phenylpropanol                           | 32.50   | 122-97-4   | 3.60±0.55     | -              | 5.20±0.15      |
| 1-Tetradecanol                             | 34.92   | 112-72-1   | 3.39±0.46     | 2.43±0.16      | 5.99±0.63      |
| 1-Hexadecanol                              | 38.5317 | 36653-82-4 | 2.81±0.41     | 3.88±0.20      | 4.21±0.02      |
| <hr/>                                      |         |            |               |                |                |
| Aldehydes                                  |         |            |               |                |                |
| 2-methyl-Propanal,                         | 2.55    | 78-84-2    | 3583.24±97.36 | 3849.98±298.87 | 2747.22±147.10 |
| Butanal                                    | 3.13    | 123-72-8   | 160.96±20.44  | -              | 45.99±0.85     |
| (E)-2-Butenal,                             | 3.19    | 123-73-9   | -             | 196.24±17.90   | 3.30±0.40      |
| Pent-2-ynal                                | 3.37    | 55136-52-2 | 339.69±1.11   | 413.07±24.64   | 369.72±14.54   |
| 2-methyl-Butanal,                          | 3.63    | 96-17-3    | 1189.60±65.03 | 980.11±35.80   | -              |

|                                                           |       |           |                |                |                 |
|-----------------------------------------------------------|-------|-----------|----------------|----------------|-----------------|
| 3-methyl-Butanal,                                         | 3.70  | 590-86-3  | 2264.60±113.53 | 1524.51±179.20 | 181.97±4.51     |
| 2-methyl-Pentanal,                                        | 5.66  | 123-15-9  | 163.66±16.68   | 254.66±16.68   | -               |
| Hexanal                                                   | 8.01  | 66-25-1   | 6249.84±728.12 | 1215.51±53.87  | 10085.67±303.61 |
| 2-Butenal, 2-methyl-                                      | 8.33  | 1115-11-3 | 706.15±29.39   | 272.85±44.15   | -               |
| 3-Hexenal, (Z)-                                           | 9.99  | 6789-80-6 | 303.19±39.04   | -              | -               |
| Heptanal                                                  | 11.32 | 111-71-7  | 713.28±117.54  | -              | -               |
| Octanal                                                   | 14.57 | 124-13-0  | 131.71±16.45   | 161.33±12.08   | -               |
| 2-Octenal, (E)-                                           | 18.51 | 2548-87-0 | -              | 108.00±17.22   | -               |
| Decanal                                                   | 20.37 | 112-31-2  | 128.13±10.75   | 97.70±1.83     | -               |
| Benzaldehyde                                              | 20.91 | 100-52-7  | -              | 624.23±11.37   | 1740.89±240.84  |
| (E,Z)-2,6-Nonadienal,                                     | 22.52 | 557-48-2  | 128.81±7.05    | 116.95±16.91   | 207.05±14.22    |
| Benzeneacetaldehyde                                       | 23.80 | 122-78-1  | 406.60±27.08   | 170.87±3.89    | 90.04±2.96      |
| 1,3-Cyclohexadiene-1-<br>carboxaldehyde, 2,6,6-trimethyl- | 23.94 | 116-26-7  | 146.29±19.59   | 118.53±7.00    | -               |

|                                                         |       |            |                |             |                |
|---------------------------------------------------------|-------|------------|----------------|-------------|----------------|
| Cinnamaldehyde, (E)-                                    | 32.29 | 14371-10-9 | -              | 1.30±0.12   | -              |
| Vanillin                                                | 41.47 | 121-33-5   | 2.42±0.38      | -           | 9.21±1.25      |
| Benzaldehyde, 4-hydroxy-                                | 45.90 | 123-08-0   | -              | -           | 5.92±0.41      |
| <hr/>                                                   |       |            |                |             |                |
| Ketones                                                 |       |            |                |             |                |
| 2-Pentanone                                             | 4.94  | 107-87-9   | 2614.26±258.18 | -           | -              |
| Methyl Isobutyl Ketone                                  | 5.73  | 108-10-1   | -              | -           | 114.08±5.05    |
| 1-Penten-3-one                                          | 6.12  | 1629-58-9  | 107.55±11.00   | -           | -              |
| 3-Hexanone                                              | 7.09  | 589-38-8   | -              | 51.97±9.28  | -              |
| 2-Octanone                                              | 14.46 | 111-13-7   | -              | 8.93±0.41   | -              |
| 5-Hepten-2-one, 6-methyl-                               | 16.04 | 110-93-0   | 3213.89±298.72 | -           | 2368.80±282.71 |
| 2-Cyclohexen-1-one                                      | 18.64 | 930-68-7   | 31.00±5.43     | -           | 27.35±4.06     |
| Thujone                                                 | 18.80 | 546-80-5   | -              | -           | 562.71±88.06   |
| Bicyclo[2.2.1]heptan-2-one, 1,7,7-tri<br>methyl-, (1S)- | 20.75 | 464-48-2   | -              | -           | 628.48±6.52    |
| Butyrolactone                                           | 23.46 | 96-48-0    | -              | -           | 43.56±4.20     |
| Acetophenone                                            | 24.02 | 98-86-2    | 259.89±35.02   | 106.32±7.23 | 2015.15±186.42 |

|                                                       |       |            |              |              |               |
|-------------------------------------------------------|-------|------------|--------------|--------------|---------------|
| 2,6,6-Trimethyl-2-cyclohexene-1,4-dione               | 25.02 | 1125-21-9  | 10.07±0.88   | 9.58±1.43    | -             |
| 3-Buten-2-one, 4-(2,6,6-trimethyl-1-cyclohexen-1-yl)- | 30.37 | 14901-07-6 | 72.85±1.52   | 41.82±3.17   | 8.30±0.30     |
| Esters                                                |       |            |              |              |               |
| Ethyl Acetate                                         | 3.28  | 141-78-6   | 146.20±13.86 | 344.41±37.91 | 1563.36±26.14 |
| Formic acid, butyl ester                              | 10.39 | 592-84-7   | 83.28±9.60   | -            | -             |
| Hexanoic acid, ethyl ester                            | 12.95 | 123-66-0   | -            | 7.30±0.43    | 344.74±28.56  |
| Acetic acid, hexyl ester                              | 14.14 | 142-92-7   | 13.94±2.64   | -            | 38.07±1.44    |
| Cyclohexene, 3-methyl-6-(1-methylethylidene)-         | 14.28 | 586-63-0   | 22.19±2.17   | 82.77±15.92  | 605.65±14.45  |
| cis-3-Hexenyl-**-methylbutyrate                       | 19.74 | 53398-85-9 | 20.97±1.07   | 36.53±2.44   | -             |
| Formic acid, octyl ester                              | 21.99 | 112-32-3   | 208.85±29.21 | 262.26±52.23 | -             |
| Benzoic acid, methyl ester                            | 23.38 | 93-58-3    | -            | -            | 138.02±4.99   |
| 2(3H)-Furanone, 5-ethyldihydro-                       | 25.21 | 695-06-7   | 125.31±16.74 | 64.97±11.40  | 47.33±0.62    |
| cis-3-Hexenyl cis-3-hexenoate                         | 25.73 | 61444-38-0 | 28.83±3.68   | -            | -             |
| Methyl salicylate                                     | 26.86 | 119-36-8   | -            | -            | 27.93±1.16    |
| Benzeneacetic acid, ethyl ester                       | 27.13 | 101-97-3   | -            | -            | 5.77±0.17     |
| Diisopropyl adipate                                   | 37.10 | 6938-94-9  | -            | 13.27±1.58   | -             |
| Tetradecanoic acid, ethyl ester                       | 32.54 | 124-06-1   | -            | -            | 0.94±0.06     |

|                                                            |       |            |               |             |                 |
|------------------------------------------------------------|-------|------------|---------------|-------------|-----------------|
| Hexadecanoic acid, ethyl ester                             | 36.34 | 628-97-7   | -             | -           | 11.05±0.59      |
| Dimethyl phthalate                                         | 37.10 | 131-11-3   | 16.73±0.59    | 13.10±0.61  | 19.47±1.22      |
| 2(4H)-Benzofuranone, 5,6,7,7a-tetrahydro-4,4,7a-trimethyl- | 37.88 | 15356-74-8 | 8.17±0.92     | 7.27±0.45   | 10.02±0.14      |
| 1,2-Benzenedicarboxylic acid, bis(2-methylpropyl) ester    | 41.17 | 84-69-5    | -             | -           | 2.83±0.40       |
| Hydrocarbons                                               |       |            |               |             |                 |
| Pentane                                                    | 1.75  | 109-66-0   | 2436.85±6.90  | -           | 2008.31±20.60   |
| (1S)-2,6,6-Trimethylbicyclo[3.1.1]hept-2-ene               | 6.07  | 7785-26-4  | 464.59±12.48  | 194.32±5.18 | 270.40±23.23    |
| Bicyclo[3.1.1]heptane, 6,6-dimethyl-2-methylene-, (1S)-    | 8.46  | 18172-67-3 | -             | -           | 519.53±38.82    |
| Cyclohexene, 1-methyl-4-(1-methylethenyl)-, (S)-           | 11.60 | 5989-54-8  | 2275.06±96.48 |             | 16233.33±550.76 |
| Styrene                                                    | 13.51 | 100-42-5   | -             | 171.99±7.14 | 1036.42±46.07   |
| Ethane, 1,1,2-trichloro-                                   | 13.77 | 79-00-5    | -             | 30.85±3.57  | -               |
| Tridecane, 3-methyl-                                       | 16.83 | 6418-41-3  | -             | -           | 46.44±9.63      |
| Phenol, 2-methyl-5-(1-methylethyl)-                        | 35.61 | 499-75-2   | -             | -           | 10.26±1.12      |

|                          |       |           |                |              |                |
|--------------------------|-------|-----------|----------------|--------------|----------------|
| Phenol, 4-propyl-        | 44.20 | 645-56-7  | -              | -            | 17.87±1.10     |
| Acids                    |       |           |                |              |                |
| Butanoic acid, 3-methyl- | 24.83 | 503-74-2  | -              | -            | 44.88±4.92     |
| Butanoic acid            | 26.40 | 107-92-6  | -              | 39.39±5.96   | -              |
| Heptanoic acid           | 28.70 | 111-14-8  | -              | 102.91±11.98 | -              |
| Octanoic acid            | 33.07 | 124-07-2  | 24.95±4.11     | 29.33±3.15   | 43.66±4.97     |
| Nonanoic acid            | 35.09 | 112-05-0  | 14.98±1.88     | 16.85±0.07   | 23.98±1.52     |
| n-Decanoic acid          | 37.01 | 334-48-5  | -              | 4.14±0.79    | 6.10±0.64      |
| Dodecanoic acid          | 40.60 | 143-07-7  | 19.50±3.20     | 20.40±2.60   | 12.59±1.09     |
| Oxacycles                |       |           |                |              |                |
| Furan, 2-ethyl-          | 4.39  | 3208-16-0 | 7805.76±511.80 | 687.75±9.59  | 6066.91±138.33 |
| Furan, 2-pentyl-         | 12.80 | 3777-69-3 | 64.01±3.32     | -            | 55.15±2.38     |
| Ethanone, 1-(2-furanyl)- | 20.50 | 1192-62-7 | 11.24±1.01     | 25.50±0.42   | -              |



|                     |       |           |              |             |                |
|---------------------|-------|-----------|--------------|-------------|----------------|
| Benzothiazole       | 30.68 | 95-16-9   | 23.87±2.16   | 56.63±0.45  | 226.12±15.53   |
| Other substances    |       |           |              |             |                |
| Ethanolamine        | 2.56  | 141-43-5  | -            | -           | 248.14±28.69   |
| Furan, 3-methyl-    | 3.07  | 930-27-8  | 441.91±28.20 | 491.81±6.26 | 8.13±0.46      |
| Dimethyl trisulfide | 17.07 | 3658-80-8 | -            | 47.59±4.00  | -              |
| Ammonium acetate    | 19.16 | 631-61-8  | -            | -           | 6513.33±635.33 |

- indicates that the compound is undetected or has a low match score.
